# Supplementary material
Source: PubMed Central journal article supplement (PMC7499244)
Supplement: jamaoncol-e203697-s001.pdf [file jamaoncol-e203697-s001.pdf]

## Supplementary Online Content

Senft N, Hamel LM, Manning MA, et al. Willingness to discuss clinical trials among Black vs White men with prostate cancer. *JAMA Oncol*. Published online September 17, 2020. doi:10.1001/jamaoncol.2020.3697

### **eTable.** MANOVA Results

This supplementary material has been provided by the authors to give readers additional information about their work.

**eTable. MANOVA Results<sup>a,b</sup>**

|                               |       | Mean  |       | KCI <sup>c</sup> vs. SKCCC <sup>d</sup> |      | Black vs. White |      |
|-------------------------------|-------|-------|-------|-----------------------------------------|------|-----------------|------|
|                               |       | Black | White | F(1,182)                                | p    | F(1,182)        | p    |
| Model 1                       |       |       |       |                                         |      |                 |      |
| Age                           | KCI   | 64.08 | 68.06 | 1.00                                    | 0.32 | 8.67            | 0.00 |
|                               | SKCCC | 63.29 | 66.43 |                                         |      |                 |      |
| Education <sup>e</sup>        | KCI   | 2.94  | 4.21  | 6.93                                    | 0.01 | 22.79           | 0.00 |
|                               | SKCCC | 3.68  | 4.78  |                                         |      |                 |      |
| Income <sup>e</sup>           | KCI   | 2.04  | 4.06  | 19.49                                   | 0.00 | 79.59           | 0.00 |
|                               | SKCCC | 3.23  | 4.52  |                                         |      |                 |      |
| Economic Burden               | KCI   | 2.19  | 1.37  | 3.51                                    | 0.06 | 42.46           | 0.00 |
|                               | SKCCC | 1.87  | 1.28  |                                         |      |                 |      |
| Model 2                       |       |       |       | F(1,184)                                | p    | F(1,184)        | p    |
| Pain/Physical Limitation      | KCI   | 1.66  | 1.46  | 0.42                                    | 0.52 | 2.41            | 0.12 |
|                               | SKCCC | 1.53  | 1.49  |                                         |      |                 |      |
| Health Literacy               | KCI   | 3.75  | 4.19  | 0.75                                    | 0.39 | 9.84            | 0.00 |
|                               | SKCCC | 3.87  | 4.32  |                                         |      |                 |      |
| General Trust in Physicians   | KCI   | 3.58  | 3.84  | 5.12                                    | 0.02 | 1.09            | 0.30 |
|                               | SKCCC | 3.48  | 3.44  |                                         |      |                 |      |
| Group-Based Medical Suspicion | KCI   | 2.19  | 1.69  | 1.23                                    | 0.27 | 21.48           | 0.00 |
|                               | SKCCC | 2.05  | 1.61  |                                         |      |                 |      |

<sup>a</sup>Results exclude outliers

<sup>b</sup>MANOVAs also explored potential site by race interactions. These interactions were statistically nonsignificant in multivariate tests. To streamline presentation of results and avoid overinterpretation of univariate tests approaching significance, these interactions are not presented in detail.

<sup>c</sup>KCI = Karmanos Cancer Institute

<sup>d</sup>SKCCC = Sidney Kimmel Comprehensive Cancer Center

<sup>e</sup>Income and education were treated as continuous variables given lack of skew and theoretical normal distributions at the population level.
